# Supplementary material for: Vísperas de la revolución. El congreso de la CNT (1936)
Source: MDPI journal article supplement (doi:10.3390/jpm12122059), 2009-01-01
Supplement: s1 [file s1]

**Table S1. Linear regression analysis of echocardiographic parameters and CTR**

| Variables                                                    | Univariate                                     |                      | Multivariate                                   |                      |
|--------------------------------------------------------------|------------------------------------------------|----------------------|------------------------------------------------|----------------------|
|                                                              | Unstandardized coefficient $\beta$<br>(95% CI) | <i>p</i> -<br>value- | Unstandardized coefficient $\beta$<br>(95% CI) | <i>p</i> -<br>value- |
| LA diameter (per 1 cm)                                       | 1.531 (0.210 – 2.851)                          | 0.023                | 0.295 (-1.339 – 1.929)                         | 0.722                |
| LVIDd (per 1 cm)                                             | -0.892 (-2.210 – 0.426)                        | 0.183                | –                                              | –                    |
| LVPWd (per 1 cm)                                             | 3.017 (-1.854 – 7.889)                         | 0.223                | –                                              | –                    |
| LVEF (per 1 %)                                               | -0.033 (-0.123 – 0.056)                        | 0.461                | –                                              | –                    |
| LVFS (per 1 %)                                               | -0.042 (-0.161 – 0.077)                        | 0.489                | –                                              | –                    |
| Early mitral valve flow velocity (E)<br>(per 1 cm/s)         | 0.023 (-0.007 – 0.052)                         | 0.127                | –                                              | –                    |
| Mitral annulus early diastolic velocity<br>(E') (per 1 cm/s) | -0.898 (-1.266 – -0.530)                       | <<br>0.001           | -0.877 (-1.354 – -0.401)                       | <<br>0.001           |
| Deceleration time of E wave (per 1 ms)                       | 0.001 (-0.014 – 0.015)                         | 0.901                | –                                              | –                    |
| RWT (per 1 unit)                                             | 7.152 (-1.968 – 16.271)                        | 0.124                | –                                              | –                    |
| E/E' (per 1 unit)                                            | 0.142 (0.049 – 0.235)                          | 0.003                | -0.016 (-0.136 – 0.104)                        | 0.789                |
| LA volume (per 1 mL)                                         | -0.007 (-0.034 – 0.020)                        | 0.620                | –                                              | –                    |
| LAVI (per 1 mL/m <sup>2</sup> )                              | 0.096 (0.020 – 0.173)                          | 0.014                | 0.050 (-0.050 – 0.150)                         | 0.323                |
| LVMI (per 1 g/m <sup>2</sup> )                               | 0.023 (0.002 – 0.044)                          | 0.034                | 0.002 (-0.022 – 0.027)                         | 0.846                |

Abbreviations: CTR, cardiothoracic ratio; LA, left atrial; LVIDd, left ventricular internal diameter at end diastole; LVPWd, left ventricular posterior wall at end diastole; LVEF, left ventricular ejection fraction; LVFS, left ventricular fractional shortening; RWT, relative wall thickness; LAVI, left atrial volume index; LVMI, left ventricular mass index.
